# Supplementary material for: Relationship between Work-Related Musculoskeletal Symptoms and Work Performance of Critical Care Nursing Staff in the Tertiary Care Hospitals
Source: Research Square preprint supplement (doi:10.21203/rs.3.rs-7607727/v1), 2025-10-22

**Relationship between work-related Musculoskeletal Symptoms and Work Performance of Critical Care Nursing Staff in Tertiary Care Hospital of Peshawar KPK”**

**SECTION A: SOCIO-DEMOGRAPHIC CHARACTERISTIC:**

1. Age=

years

2. Sex=

3. Educational level Diploma Degree Certificate Postgraduate

5. Religion - Islam Christianity Traditional

6. Marital status Single Married Divorced Widowed

7. Type of Health facility you are working with: KTH HMC PIC LRH

8. Years of experience in critical care Unit : 3-4 years 4-6 years

7-10 years More than 10yrs

9. Weight_______kg Height______m Calcuted BMI……... (Formula for BMI= weight in kg/height in meter2)

**SECTION B: Work Ability Index:**

**Instructions**

The Work Ability Index (WAI) contains questions concerning your work, your work ability and your health. Your answers help you at the final conclusion whether measures for improving your health have to be taken and if your work ability must be improved. Please fill in the questionnaire thoroughly and answer all questions:

| **Is your work** | | | | | | | | | | | | | | | | | | | | | | | | | | | |
| --- | --- | --- | --- | --- | --- | --- | --- | --- | --- | --- | --- | --- | --- | --- | --- | --- | --- | --- | --- | --- | --- | --- | --- | --- | --- | --- | --- |
|  | | | | | | | | | | | | | | | | | | | | | | | |  | | | |
| Psychologically demanding? | | | | | | | | | | | | | | | | | | | | | | | | 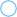 | | | |
| Physically demanding? | | | | | | | | | | | | | | | | | | | | | | | | 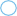 | | | |
| Physically and psychologically demanding? | | | | | | | | | | | | | | | | | | | | | | | | 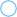 | | | |
|  | | | | | | | | | | | | | | | | | | | | | | | |  | | | |
| **1. Current work ability compared to highest work ability ever:** | | | | | | | | | | | | | | | | | | | | | | | | | | | |
| Assume that your work ability at its best has a value of 10 points. How many points would you give your current work ability? (0 means that you currently cannot work at all) (10 work ability at its best) | | | | | | | | | | | | | | | | | | | | | | | | | | | |
| 0 | | 1 | 2 | | | 3 | | 4 | | | 5 | 6 | | | 7 | | | 8 | | | 9 | | 10 | | | | |
| 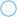 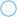 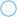 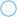 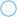 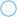 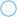 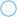 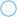 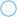 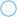 | | | | | | | | | | | | | | | | | | | | | | | | | | | |
| **2. Work ability in relation to demands** | | | | | | | | | | | | | | | | | | | | | | | | | | | |
| How do you rate your current work ability with respect to the physical demands of your work? | | | | | | | | | | | | | | | | | | | | | | | | | | | |
| Very good (5) | | | | | Rather good (4) | | | | | Moderate (3) | | | | Rather poor (2) | | | | | | | Very poor (1) | | | | | | |
| 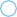 | | | | | 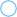 | | | | | 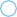 | | | | 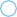 | | | | | | | 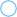 | | | | | | |
| How do you rate your current work ability with respect to the mental demands of your work? | | | | | | | | | | | | | | | | | | | | | | | | | | | |
| Very good (5) | | | | | Rather good (4) | | | | | Moderate (3) | | | | Rather poor (2) | | | | | | | Very poor (1) | | | | | | |
| 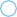 | | | | | 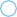 | | | | | 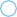 | | | | 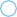 | | | | | | | 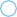 | | | | | | |
| **3. Current diseases** | | | | | | | | | | | | | | | | | | | | | | | | | | | |
| In the following list, mark your current diseases or injuries. Also indicate whether a physician has diagnosed or treated these diseases. | | | | | | | | | | | | | | | | | | Yes, own opinion (2) | | | Yes, physician’s diagnosis  (1) | | | No (0) | | | |
| 01 | | | Injury due to an accident | | | | | | | | | | | | | | | 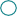 | | | 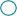 | | | 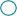 | | | |
| 02 | | | Musculoskeletal disease in back, limbs or other part of the body (e.g. repeated pain in joint muscle, sciatica, rheumatism, arthritis) | | | | | | | | | | | | | | | 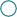 | | | 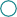 | | | 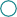 | | | |
| 03 | | | Cardiovascular disease  (e.g. hypertension, coronary heart disease) | | | | | | | | | | | | | | | 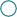 | | | 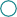 | | | 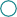 | | | |
| 04 | | | Respiratory disease  (e.g. repeated infections of the respiratory tract, emphysema) | | | | | | | | | | | | | | | 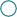 | | | 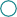 | | | 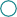 | | | |
| 05 | | | Mental disorder  (e.g. depression, “burn-out”, anxiety or insomnia) | | | | | | | | | | | | | | | 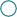 | | | 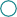 | | | 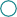 | | | |
| 06 | | | Neurological or sensory disease  (e.g. hearing or visual disease, migraine, epilepsy) | | | | | | | | | | | | | | | 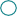 | | | 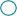 | | | 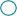 | | | |
| 07 | | | Digestive disease / condition  (e.g. gastritis, gall stones, liver or pancreatic disease, repeated constipation) | | | | | | | | | | | | | | | 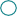 | | | 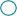 | | | 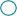 | | | |
| 08 | | | Genitourinary disease  (e.g. infection in urinary tract, gynecological disease or prostate) | | | | | | | | | | | | | | | 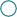 | | | 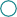 | | | 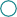 | | | |
| 09 | | | Skin disease  (e.g. allergic or other rash, varicose veins) | | | | | | | | | | | | | | | 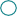 | | | 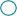 | | | 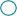 | | | |
| 10 | | | Tumour or cancer | | | | | | | | | | | | | | | 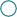 | | | 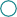 | | | 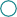 | | | |
| 11 | | | Endocrine or metabolic disease  (e.g. diabetes, severe obesity or gout) | | | | | | | | | | | | | | | 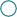 | | | 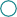 | | | 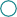 | | | |
| 12 | | | Blood diseases  (e.g. anemia, other blood disorder or defect) | | | | | | | | | | | | | | | 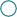 | | | 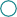 | | | 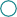 | | | |
| 13 | | | Birth defects | | | | | | | | | | | | | | | 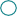 | | | 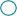 | | | 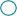 | | | |
| 14 | | | Other disorder or disease | | | | | | | | | | | | | | | 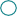 | | | 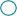 | | | 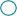 | | | |
| **4. Estimated work impairment due to diseases** | | | | | | | | | | | | | | | | | | | | | | | | | | | |
| Is your illness or injury a hindrance to your current job? Check more than one alternative if needed. | | | | | | | | | | | | | | | | | | | | | | | | | | | |
| There is no hindrance / I have no diseases. | | | | | | | | | | | | | | | | | | | | | | | | | | 6 | |
| I am able to do my job, but it causes some symptoms. | | | | | | | | | | | | | | | | | | | | | | | | | | 5 | |
| I must sometimes slow down my work pace or change my work methods. | | | | | | | | | | | | | | | | | | | | | | | | | | 4 | |
| I must often slow down my work pace or change my work methods. | | | | | | | | | | | | | | | | | | | | | | | | | | 3 | |
| Because of my condition, I feel I am able to do only part time work. | | | | | | | | | | | | | | | | | | | | | | | | | | 2 | |
| In my opinion I am entirely unable to work. | | | | | | | | | | | | | | | | | | | | | | | | | | 1 | |
| **5. Illness within last year (12 months)** | | | | | | | | | | | | | | | | | | | | | | | | | | | |
| During the last 12 months:  how many whole days have you been off work because of illness: | | | | | | | | | | | | | | | | | | | | | | | | | | | |
| None (5) | | | | | | Max. 9 days  (4) | | | | | 10 - 24 days  (3) | | | | 25 - 99 days  (2) | | | | | | | 100 - 354 days  (1) | | | | | |
| 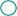 | | | | | | 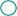 | | | | | 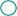 | | | | 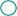 | | | | | | | 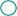 | | | | | |
|  | | | | | | | | | | | | | | | | | | | | | | | | | | | |
| **6. Estimation of own work ability in 2 years** | | | | | | | | | | | | | | | | | | | | | | | | | | | |
| Do you believe, according to your present state of health,  that you will be able to do your current job two years from now? | | | | | | | | | | | | | | | | | | | | | | | | | | | |
| Unlikely (1) | | | | | | | | | Not Certain (4) | | | | | | | | | | Relatively certain (7) | | | | | | | | |
| 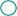 | | | | | | | | | 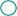 | | | | | | | | | | 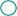 | | | | | | | | |
|  | | | | | | | | | | | | | | | | | | | | | | | | | | | |
| **7. Mental capacities** | | | | | | | | | | | | | | | | | | | | | | | | | | | |
| 7.1 | Considering the last three months: Have you been able to enjoy your regular daily activities? | | | | | | | | | | | | | | | | | | | | | | | | | | | |
| Often  (4) | | | | | | Rather often  (3) | | | | | Sometimes  (2) | | | | rather seldom  (1) | | | | | | | Never  (0) | | | | | |
| 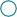 | | | | | | 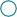 | | | | | 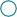 | | | | 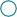 | | | | | | | 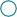 | | | | | |
| 7.2 | Considering the last three months: Have you been active and alert? | | | | | | | | | | | | | | | | | | | | | | | | | | | |
| Often  (4) | | | | | | Rather often  (3) | | | | | Sometimes  (2) | | | | rather seldom  (1) | | | | | | | Never  (0) | | | | | |
| 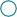 | | | | | | 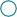 | | | | | 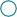 | | | | 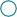 | | | | | | | 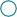 | | | | | |
| 7.3 | Considering the last three months: Have you felt yourself to be full of hope about the future? | | | | | | | | | | | | | | | | | | | | | | | | | | | |
| Often  (4) | | | | | | Rather often  (3) | | | | | Sometimes  (2) | | | | rather seldom  (1) | | | | | | | Never  (0) | | | | | |
| 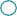 | | | | | | 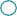 | | | | | 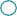 | | | | 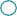 | | | | | | | 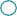 | | | | | |

| SCORE | WORK ABILITY | ACTION |
| --- | --- | --- |
| **7-27 points** | **POOR** | **RESTORE** |
| 28-36 points | **MODERATE** | **IMPROVE** |
| 37-43 points | **GOOD** | **SUPPORT** |
| 44-49 points | **EXCELLENT** | **MAINTAIN** |

**Section C: Standardized Nordic Questionnaire for Musculoskeletal Symptoms Instrument**

How to answer the questionnaire:

**Picture:** In this picture you can see the approximate position of the parts of the body referred to in the table limits are not sharply defined,and certain parts overlap, you should decide for yourself in which parts you have or have had trouble(if any):

**Table:** Please answer by putting an "X" in the appropriate box - one "X" for each question. You may be in doubt as to how to answer, but please do your best anyway. Note that column 1 of the questionnaire is to be answered even if you have never had trouble in any part of your body; columns 2 and 3 are to be answered if you answered yes in column 1.

| **To be answered by everyone** | **To be answered by those who had trouble** | |
| --- | --- | --- |
| **Have you at any time during the last 12**  **months had trouble (such as ache, pain, discomfort, numbness) in:** | Have you at any time during the last 12 monthsbeen prevented from doing your normal work (at home or away from home) because of this trouble? | Have **you had** trouble during the last 7 days? |
| **Neck:**  No Yes | NoYes | NoYes |
| **Shoulder:**  NoYes **,**right shoulder  Yes, left shoulder  Yes, both Shoulder | NoYes | NoYes |
| **Elbows**  NoYes **,**right elbow  Yes, left elbow  Yes, both elbow | NoYes | NoYes |
| **Wrist/Hands**  NoYes**,** right Wrist/hand  Yes, left Wrist/hand  Yes,both Wrist/hand | NoYes | NoYes |
| **Upper Back:**  NoYes | NoYes | NoYes |
| **Lower Back (Small of back)**  NoYes | NoYes | NoYes |
| **One or both Hips/thigh**  NoYes | NoYes | NoYes |
| **One or both knees**  NoYes | NoYes | NoYes |
| **One or both ankles/feet**  NoYes | NoYes | NoYes |


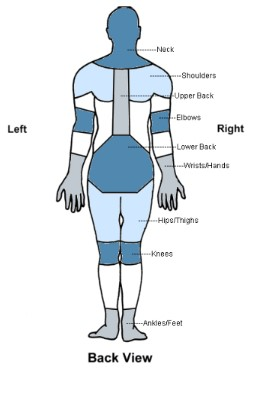

Supplement: Supplementary file 1 [file a872ed32f9dd9e83ac6664b2.docx]
